# Supplementary material for: High-throughput single-EV liquid biopsy: Rapid, simultaneous, and multiplexed detection of nucleic acids, proteins, and their combinations
Source: PubMed Central journal article supplement — Sci Adv. 2020 Nov 20;6(47):eabc1204. doi: 10.1126/sciadv.abc1204 (PMC7679165; doi:10.1126/sciadv.abc1204), 2020-11-20
Supplement: abc1204_SM.pdf [file abc1204_SM.pdf]

## Supplementary Materials for

### **High-throughput single-EV liquid biopsy: Rapid, simultaneous, and multiplexed detection of nucleic acids, proteins, and their combinations**

Jian Zhou, Zuoren Wu, Jie Hu, Dawei Yang, Xiaoyan Chen, Qin Wang, Jie Liu, Maosen Dou, Wenjun Peng, Yuanyuan Wu, Wenhao Wang, Chenjian Xie, Ming Wang, Yuanlin Song, Hengshan Zeng\*, Chunxue Bai\*

\*Corresponding author. Email: [bai.chunxue@zs-hospital.sh.cn](mailto:bai.chunxue@zs-hospital.sh.cn) (C.B.); [dixion9@163.com](mailto:dixion9@163.com) (H.Z.)

Published 20 November 2020, *Sci. Adv.* **6**, eabc1204 (2020)  
DOI: 10.1126/sciadv.abc1204

#### **This PDF file includes:**

Figs. S1 and S2  
Tables S1 to S3

## Supplemental Material

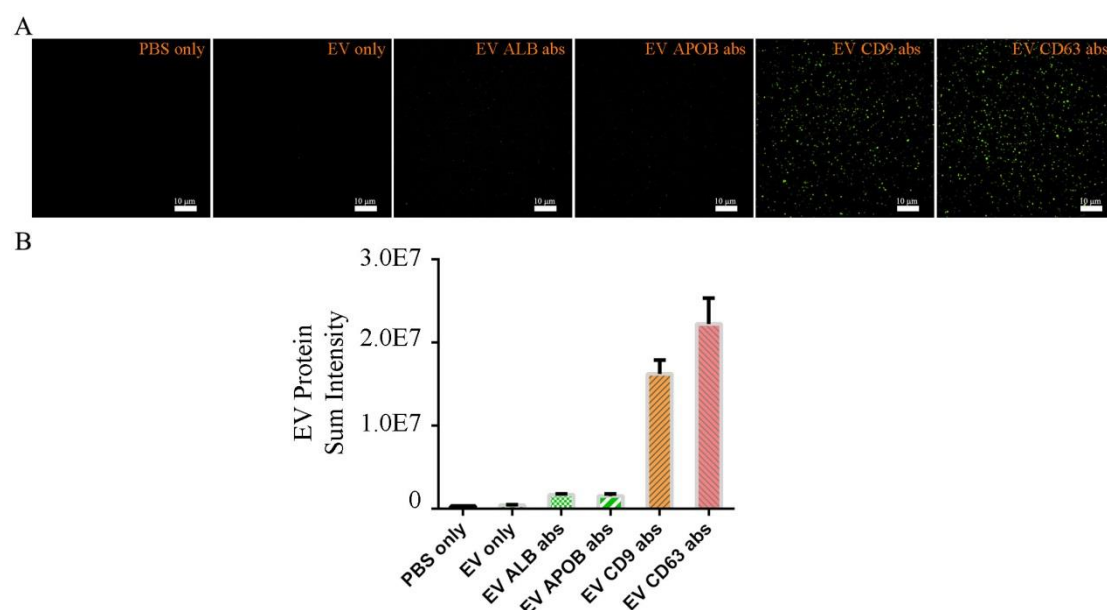

**Fig. S1. Measurement of ALB and APOB protein expression on EVs.** (A) Representative images of PBS only (no EVs and no antibodies), EV only (EVs without staining with any antibodies), EV ALB abs (EVs stained with ALB antibody), EV APOB abs (EVs stained with APOB antibody), EV CD9 abs (EVs stained with CD9 antibody), and EV CD63 abs (EVs stained with CD63 antibody). (B) Fluorescence signals of PBS only, EV only, EV ALB abs, EV APOB abs, EV CD9 abs, and EV CD63 abs measured by HNCIB system.

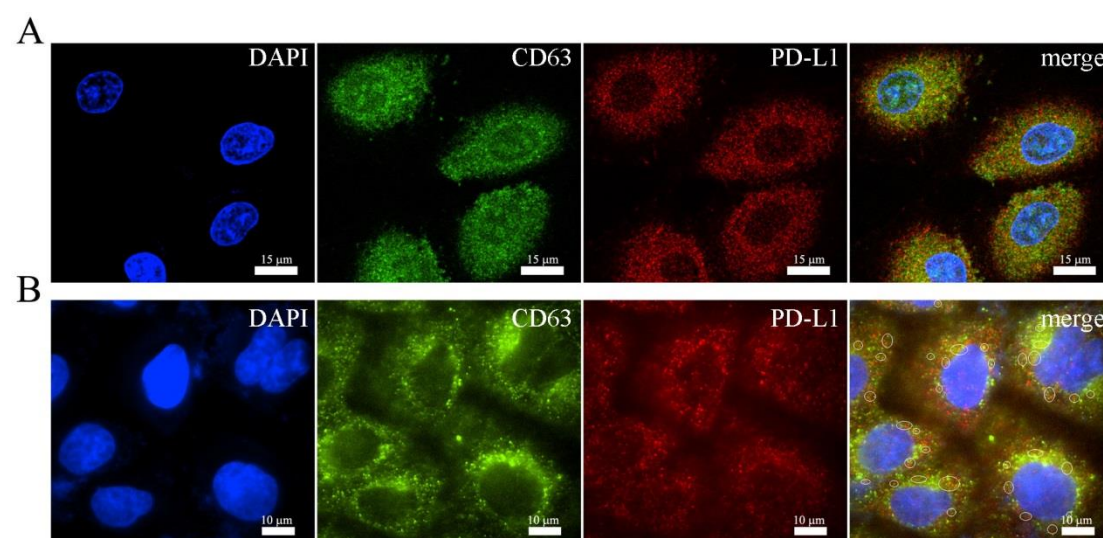

**Fig. S2. Double immunofluorescence staining for membrane protein of cells.** (A) A549 cells staining with DAPI, CD63 and PD-L1 antibodies, and imaging with a confocal microscopy (Ti2E microscope with Yokogawa CSU-W1 Sora confocal scanner unit, Nikon, Japan). (B) A549 cells staining with DAPI, CD63 and PD-L1 antibodies, and imaging with a TIRFM (Eclipse Ti-E, Nikon, Japan). White cycles containing areas expressed both CD63 and PD-L1 protein.

**Table S1. Signal-to-noise ratio and specificity.**

| <b>Fig. 2A</b>                         | <b>Mean value</b> | <b>Ratio</b> |                                          |
|----------------------------------------|-------------------|--------------|------------------------------------------|
| PBS                                    | 2.83E+05          | 64           | CD63 abs/PBS<br>(Signal-to-noise ratio)  |
| Fig.2A CD63 plasma (EV only)           | 4.08E+05          | 44           | CD63 abs/EV only<br>(Sensitivity)        |
| Fig.2A CD63 plasma (EV CD63 isotype)   | 2.02E+06          | 9            | CD63 abs/CD63 isotype<br>(Specificity)   |
| Fig.2A CD63 plasma (EV CD63 abs)       | 1.81E+07          |              |                                          |
|                                        |                   |              |                                          |
| <b>Fig. 2B</b>                         | <b>Mean value</b> | <b>Ratio</b> |                                          |
| PBS                                    | 3.19E+05          | 41           | PD-L1 abs/PBS<br>(Signal-to-noise ratio) |
| Fig.2B PD-L1 plasma (EV only)          | 3.62E+05          | 36           | PD-L1 abs/EV only<br>(Sensitivity)       |
| Fig.2B PD-L1 plasma (EV PD-L1 isotype) | 1.93E+06          | 7            | PD-L1 abs/CD63 isotype<br>(Specificity)  |
| Fig.2B PD-L1 plasma (EV PD-L1 abs)     | 1.30E+07          |              |                                          |
|                                        |                   |              |                                          |
| <b>Fig. S1</b>                         | <b>Mean value</b> | <b>Ratio</b> |                                          |
| Fig. S1 EV ALB abs                     | 1.65E+06          | 10           | CD9 abs/ALB abs                          |
| Fig. S1 EV APOB abs                    | 1.52E+06          | 15           | CD63 abs/APOB abs                        |
| Fig. S1 EV CD9 abs                     | 1.62 E+07         | 11           | CD9 abs/ APOB abs                        |
| Fig. S1 EV CD63 abs                    | 2.22E+07          | 14           | CD63 abs/ALB abs                         |

**Table S2. Demographic characteristic of patients and healthy donors.**

|                | Healthy Group (N) | Adenocarcinoma Group (N) | <i>P</i> value |
|----------------|-------------------|--------------------------|----------------|
| Number         | 35                | 34                       |                |
| Age (years)    |                   |                          | 0.067          |
| <65            | 33                | 27                       |                |
| ≥65            | 2                 | 7                        |                |
| Gender         |                   |                          | 0.549          |
| Male           | 16                | 18                       |                |
| Female         | 19                | 16                       |                |
| Smoker         | 9                 | 6                        | 0.494          |
| Nonsmoker      | 26                | 26                       |                |
| Clinical stage |                   |                          |                |
| 1/2            |                   | 5                        |                |
| 3/4            |                   | 29                       |                |

N, number of cases; *P* value represents the probability from a Chi-square test.

\**P*<0.05.

**Table S3. Antibodies used.**

| Antibody        | Company                  | Catalog Number  | Species       |
|-----------------|--------------------------|-----------------|---------------|
| CD63            | Novus Biologicals        | NBP2-42225AF488 | Mouse IgG1, K |
| Isotype control | R&D Systems              | IC002G          | Mouse IgG1    |
| PD-L1           | Abcam                    | ab209960        | Rabbit IgG    |
| PD-L1           | Novus Biologicals        | NBP1-76769      | Rabbit IgG    |
| Isotype control | Novus Biologicals        | NBP2-24891      | Rabbit IgG    |
| Secondary Ab    | Thermo Fisher Scientific | A-11011         | Rabbit IgG    |
| CD9             | Novus Biologicals        | NB500-327AF488  | Mouse IgG1    |
| ALB             | Novus Biologicals        | IC1455G         | Mouse IgG2A   |
| APOB            | Abcam                    | ab27637         | Goat IgG      |

### Biomarker detection by HNCIB

The nano-biochip was fabricated using a cleanroom-free process. An ultra-low auto-fluorescent glass was used as the substrate. After vigorous and thorough cleaning, the substrate was functionalized with a series of agents to achieve high surface grafting density of targeting functional moiety for nanoparticle immobilization. 96 or 384 wells were glued onto the functionalized substrate to form the final device.

A typical experiment using HNCIB was as follows. Cationic nanoparticles with molecular beacon was prepared in phosphate buffered saline (PBS, 14190144, Thermo Fisher Scientific, Waltham, MA, USA). To each well 50  $\mu$ L nanoparticle suspension was added and incubated at room temperature for 30 minutes followed by washing with ultrapure water ( $>18\text{ M}\Omega$ ) for 5 minutes. 50  $\mu$ L EV samples were added to each well and incubated for 60 minutes at 37 °C. Following incubation samples were washed with ultrapure water for 5 minutes. This is followed by TIRFM image acquisition. For simultaneous detection of RNA and membrane protein, the samples were then further washed with ultrapure water for 5 minutes, followed by incubation with 2% bovine albumin serum (BSA, A1933, Sigma-Aldrich, St. Louis., MO, USA) in PBS at room temperature for 30 minutes. Samples were again washed with ultrapure water for 5 minutes. 50  $\mu$ L antibody was added to the well and incubated at 37 °C for 60 minutes and when applicable the secondary antibody may be added and incubated for an additional 30 minutes. After washing with ultrapure water for 5 minutes, the samples were ready for membrane protein observation by TIRFM.
